# Supplementary material for: Acridinyl methyl esters as photoactive precursors in the release of neurotransmitteramino acids
Source: Royal Society of Chemistry journal article supplement (doi:10.1039/c2pp25261a), 2012-09-26

## Acridinyl methyl esters as photoactive precursors in the release of neurotransmitter amino acids

Ana M. Piloto,<sup>a</sup> Graham Hungerford,<sup>b</sup> Susana P. G. Costa,<sup>a</sup> and M. Sameiro T. Gonçalves\*<sup>a</sup>

### SUPPORTING INFORMATION

|                                                                                   | page |
|-----------------------------------------------------------------------------------|------|
| 1. <sup>1</sup> H and <sup>13</sup> C NMR spectra of compounds <b>3a-e</b> .      | 1    |
| 2. Normalised decay associated spectra for Acm-OH and<br>conjugates <b>3a-e</b> . | 6    |

### 1. $^1\text{H}$ and $^{13}\text{C}$ NMR spectra of compounds **3a-e**.

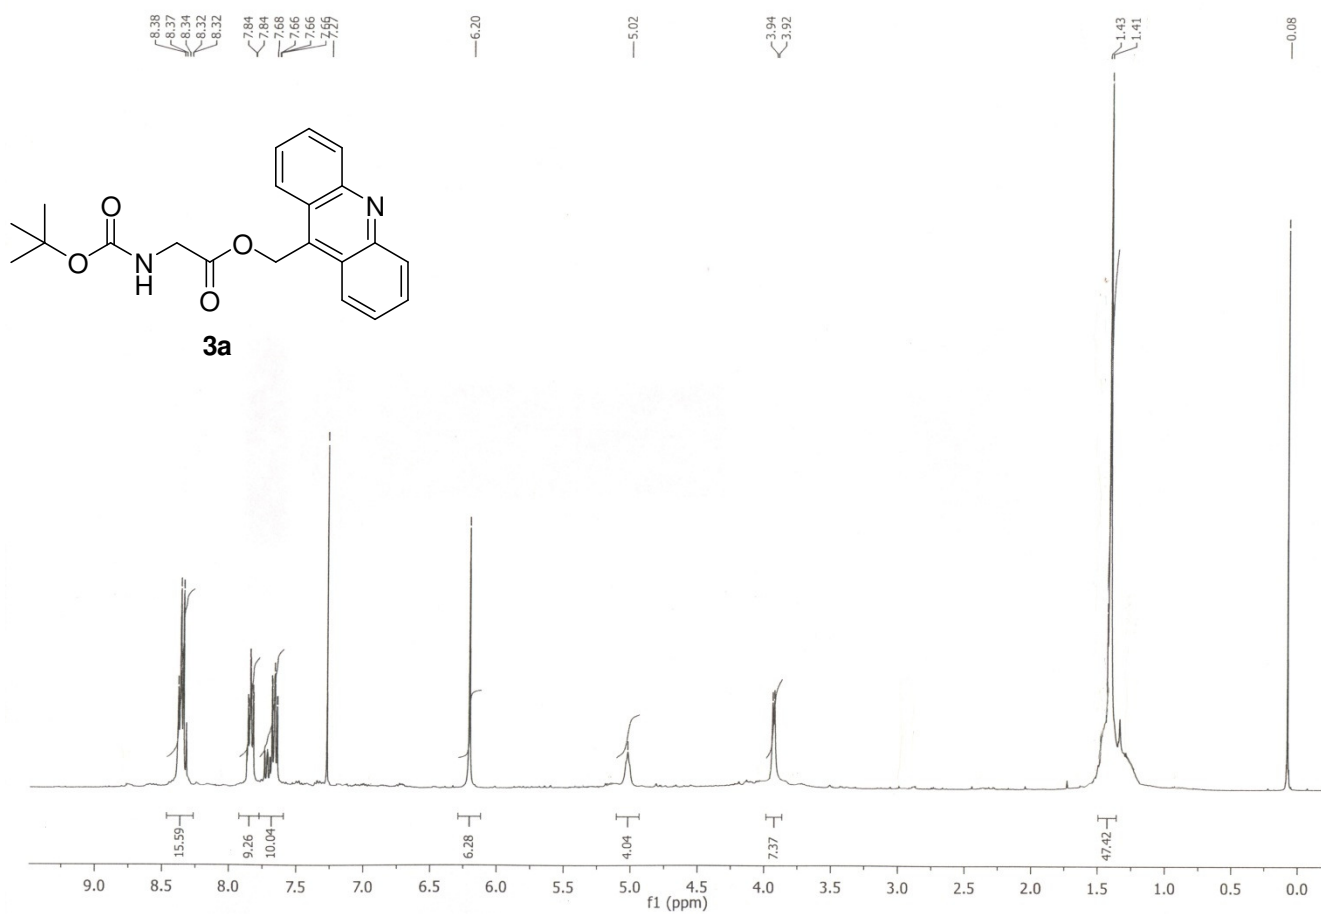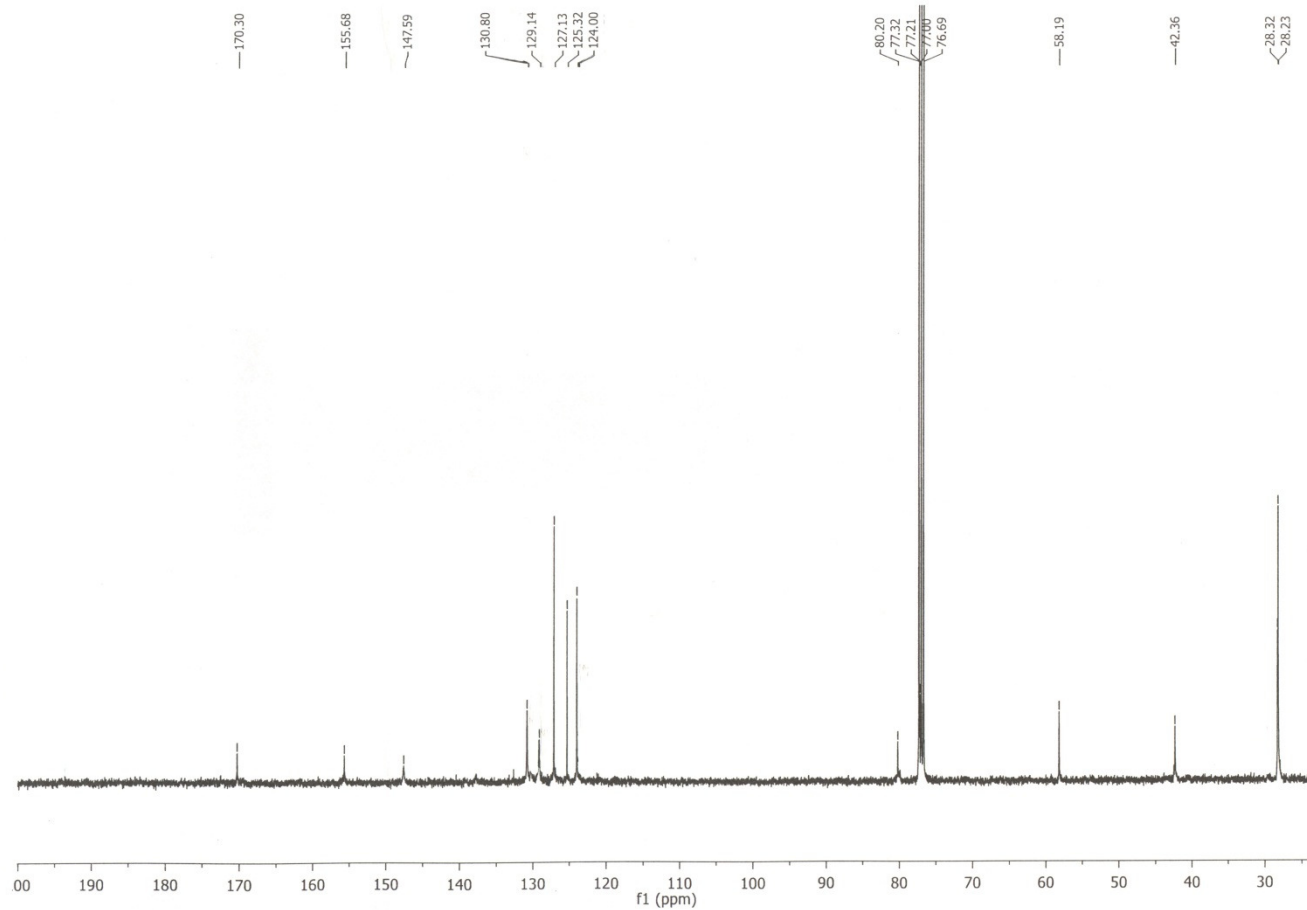

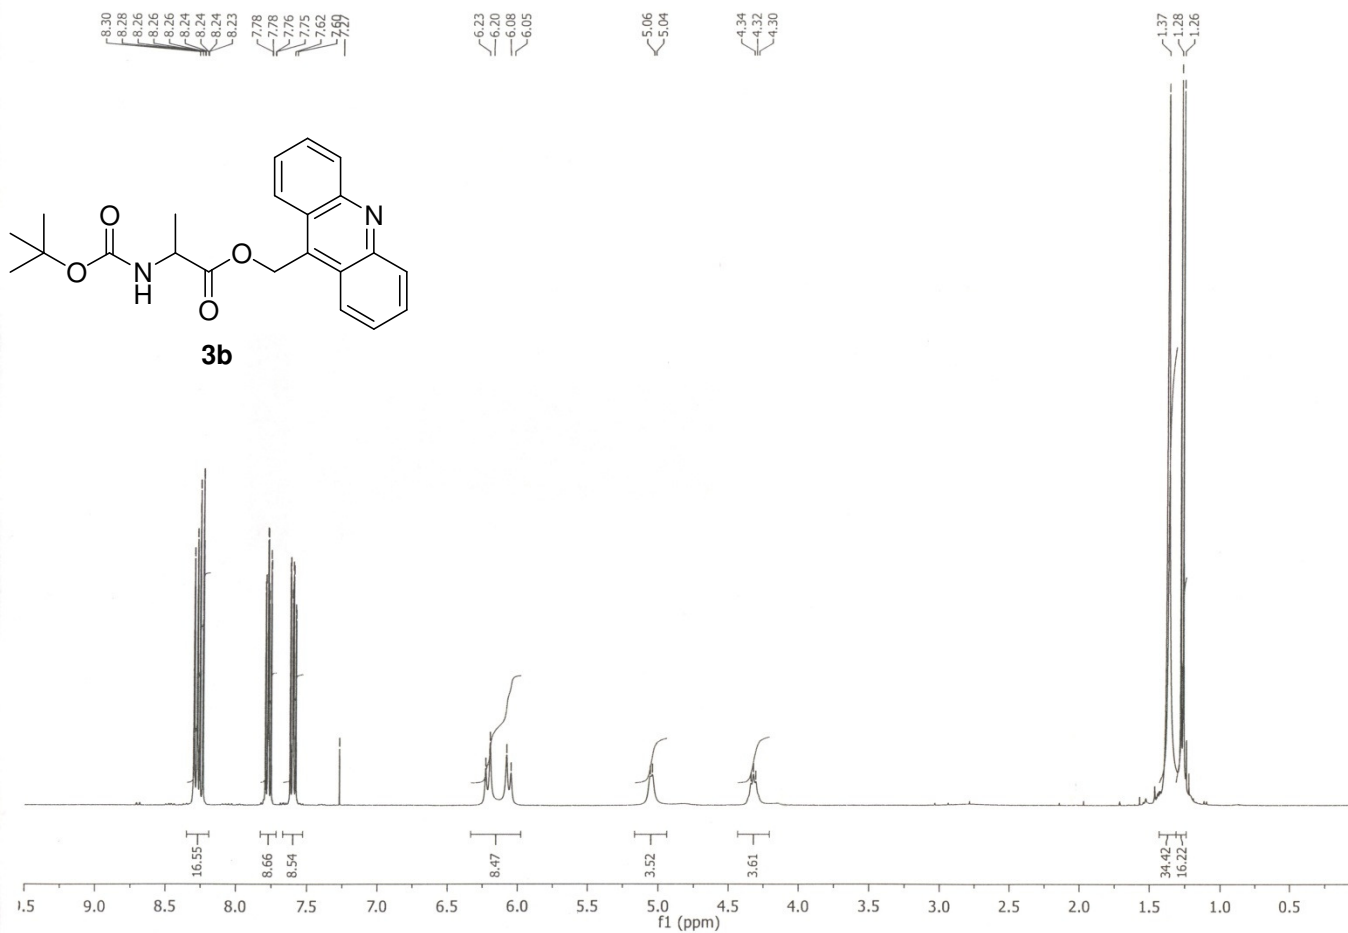

3b

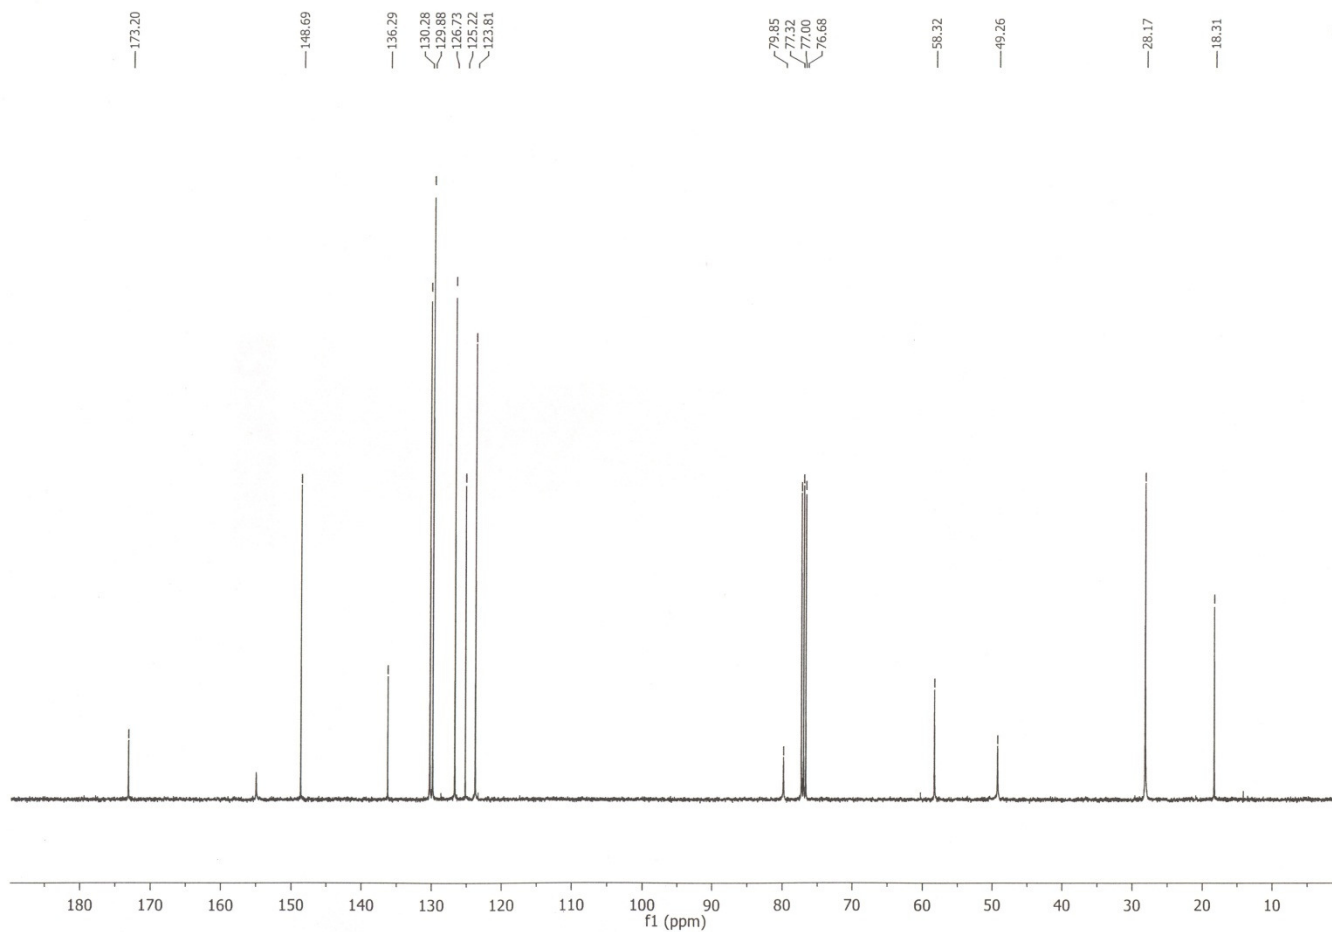

3b

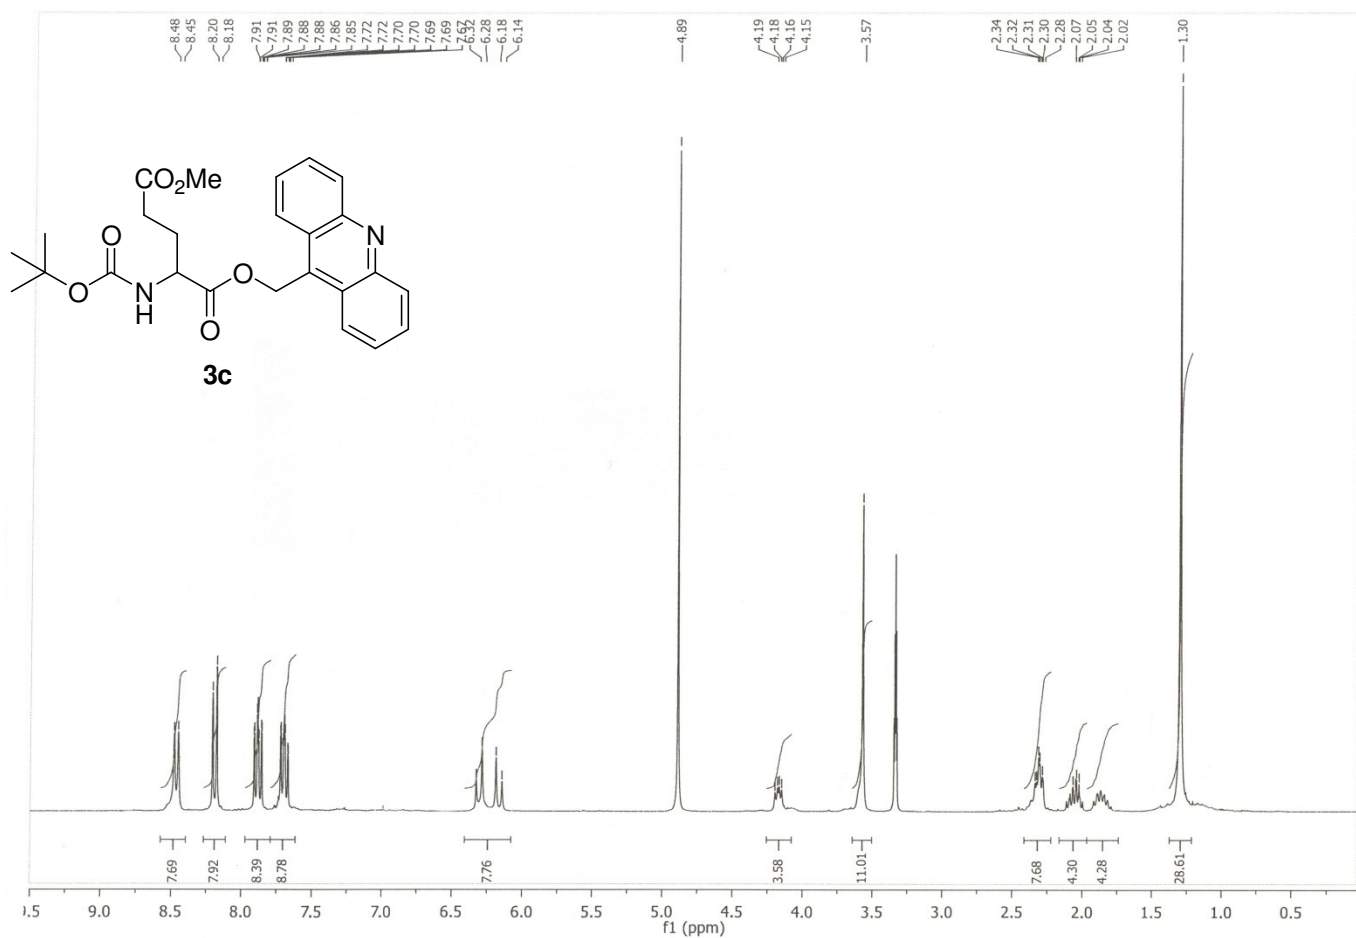

3c

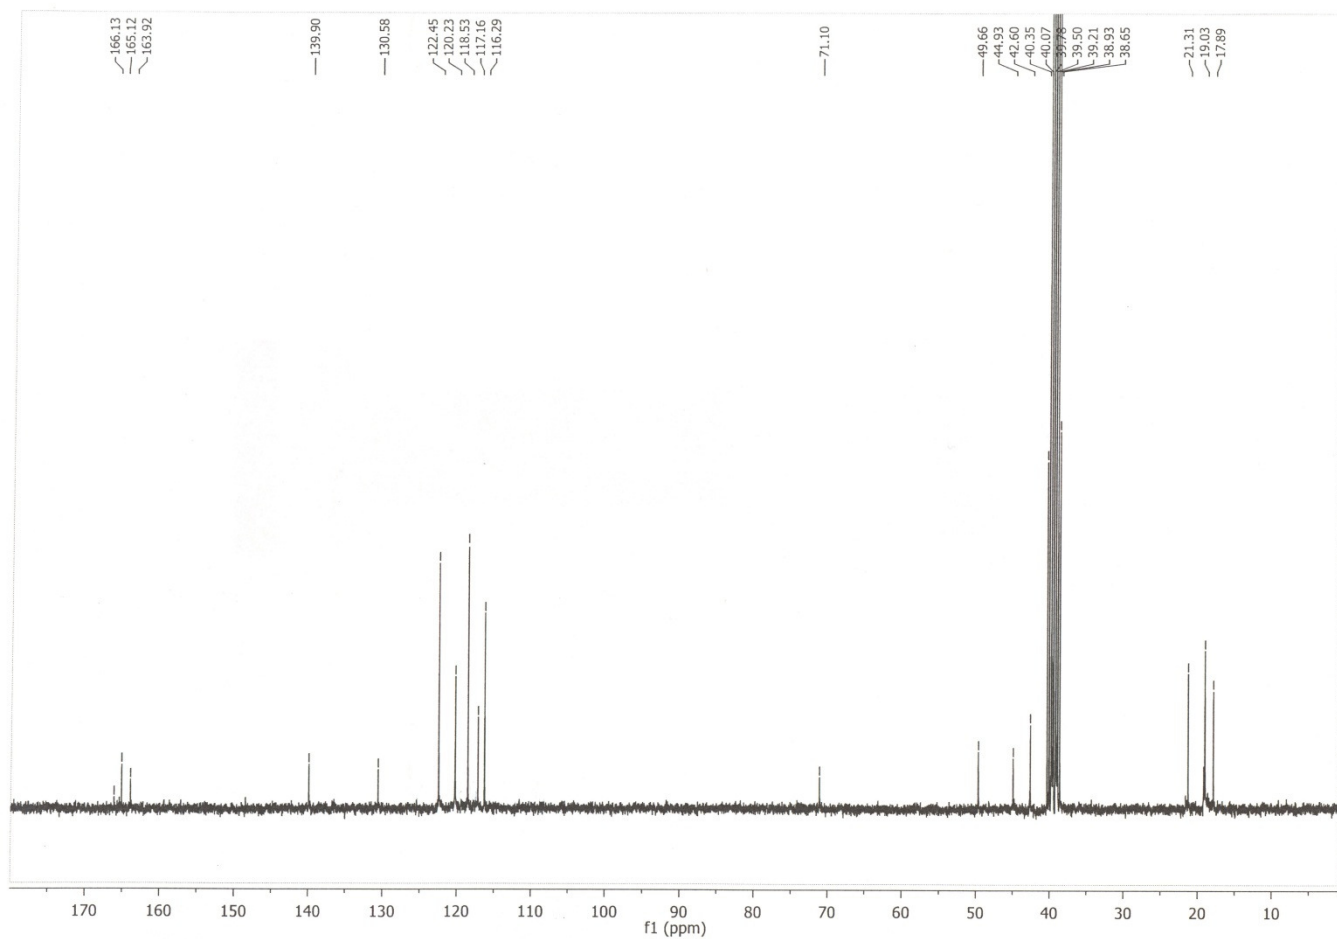

3c

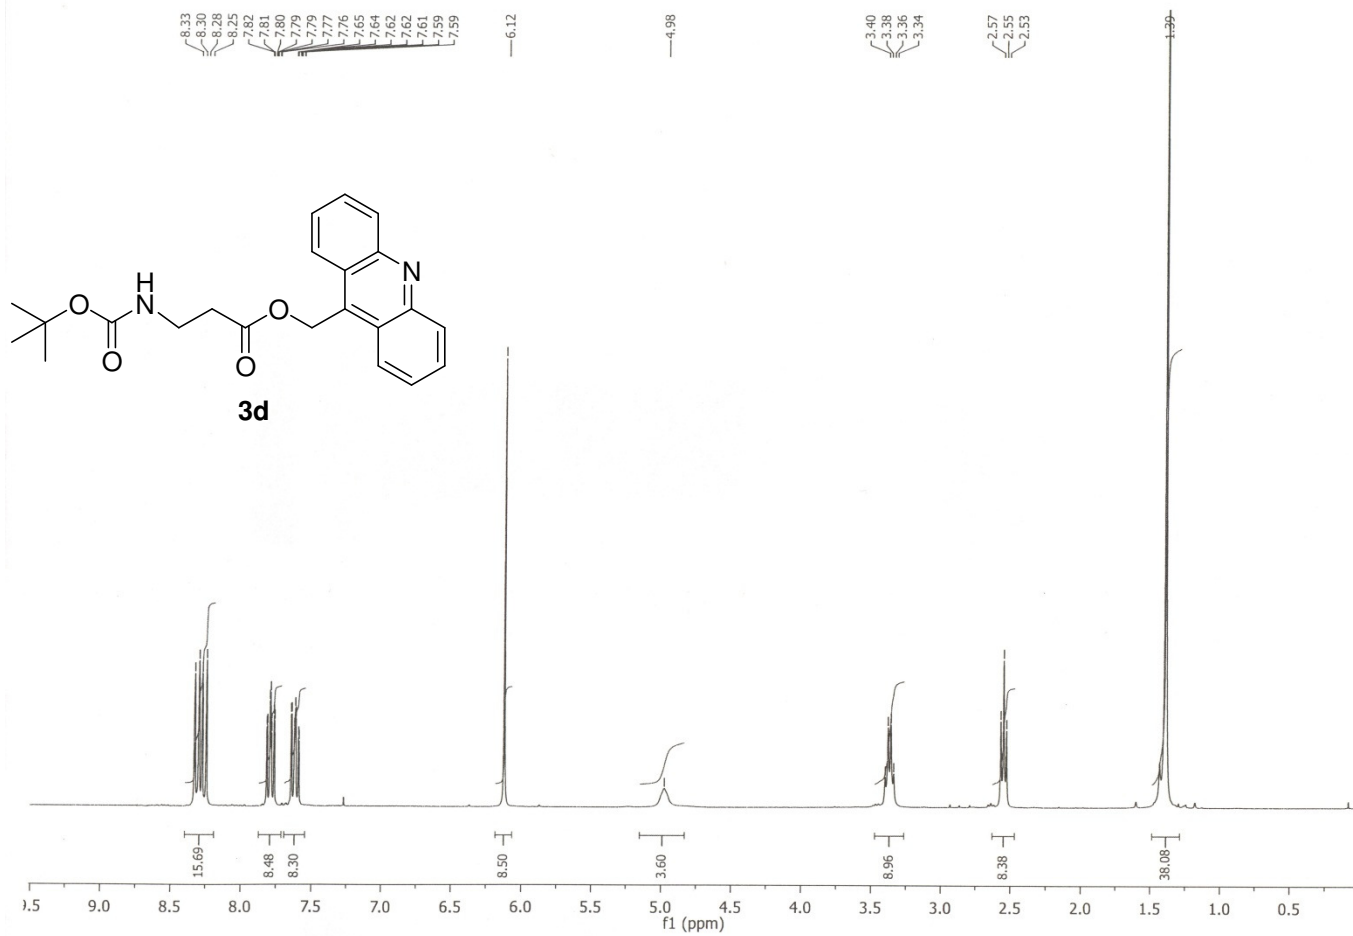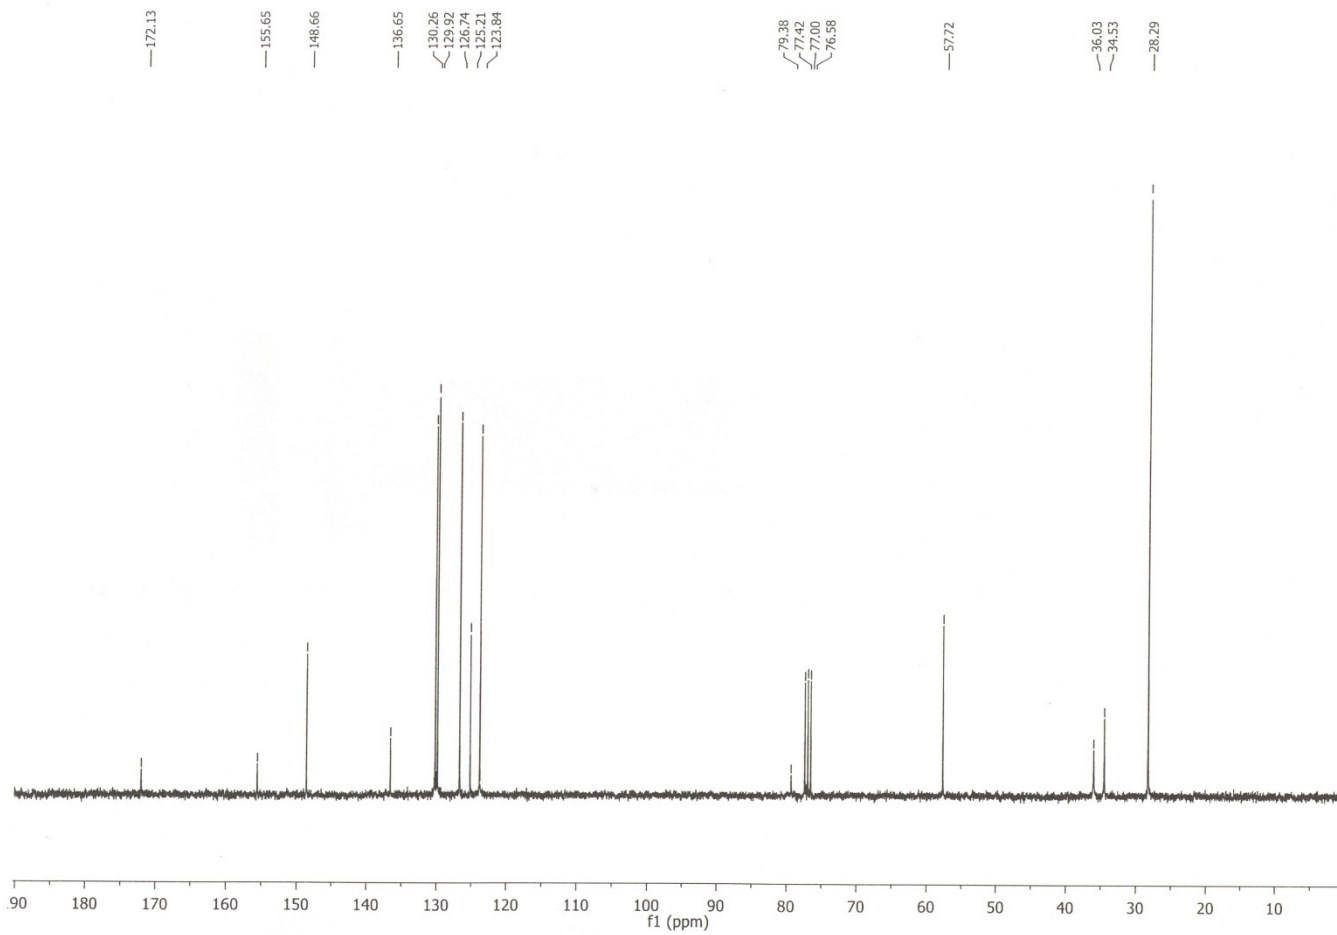

3d

3d

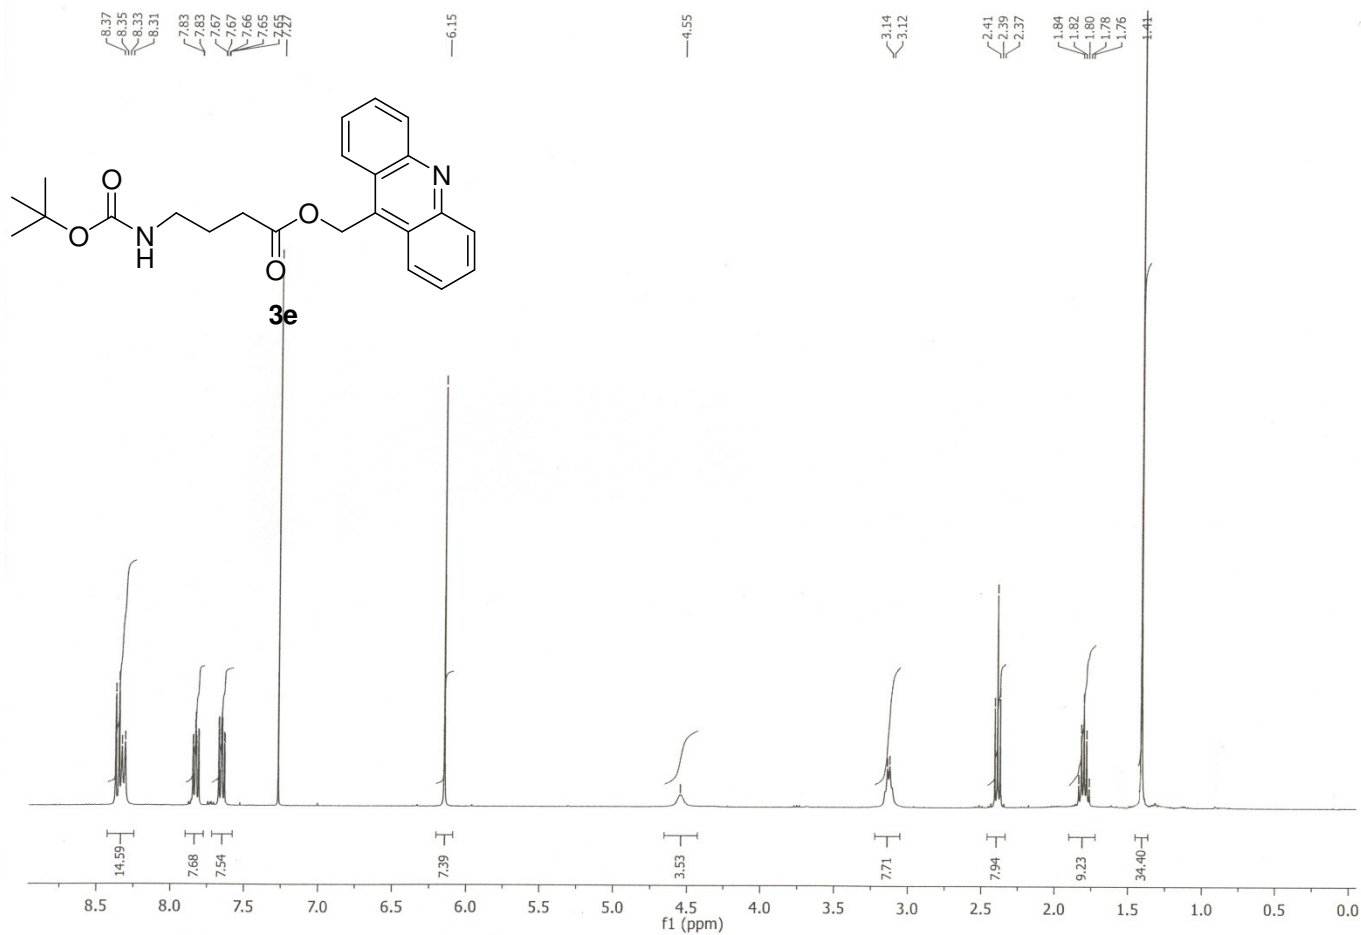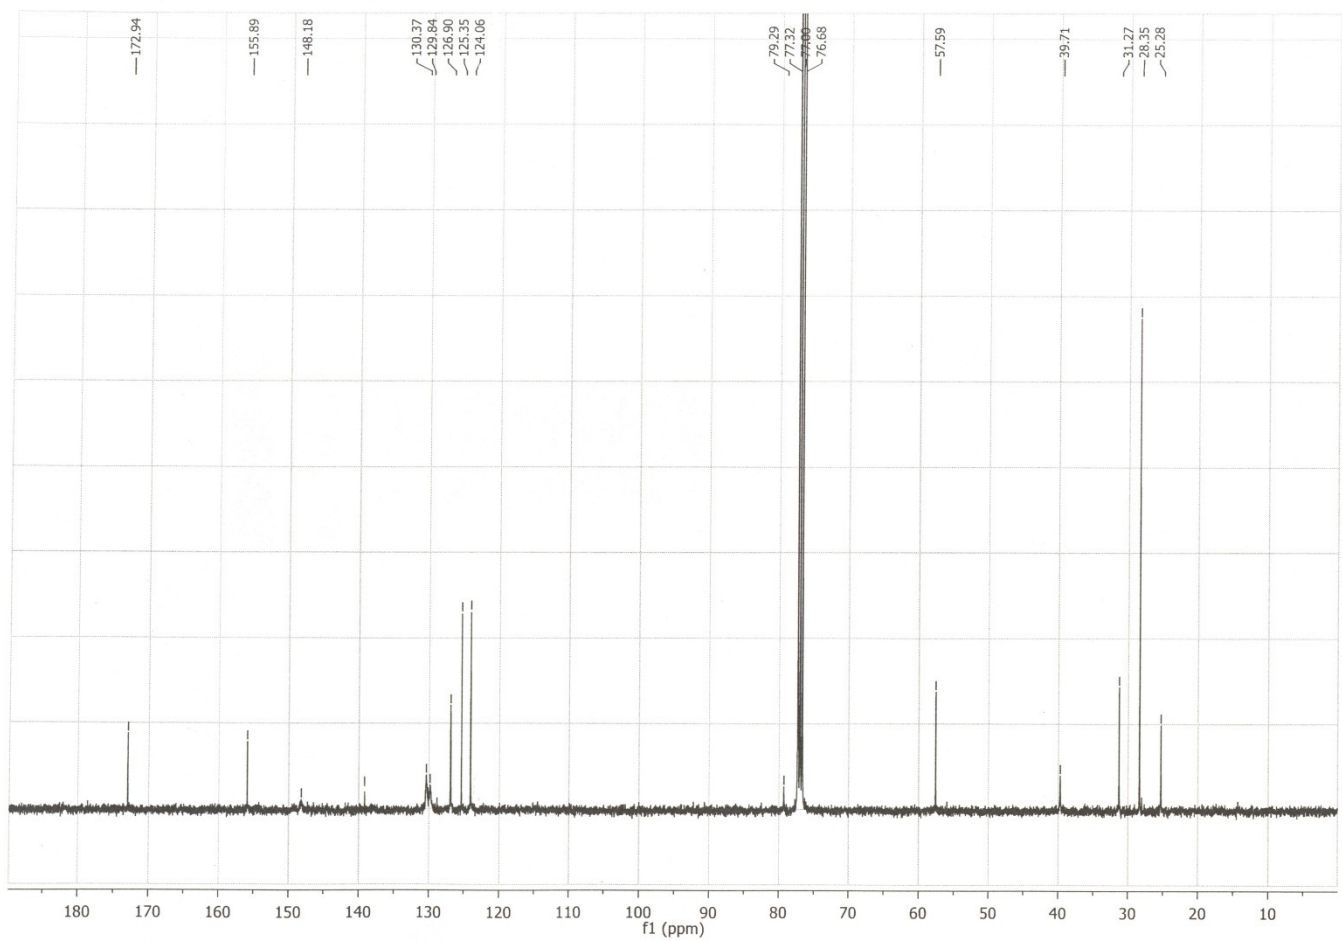

S2

S3e

5

## 2. Normalised decay associated spectra for Acm-OH and conjugates **3a-e**.

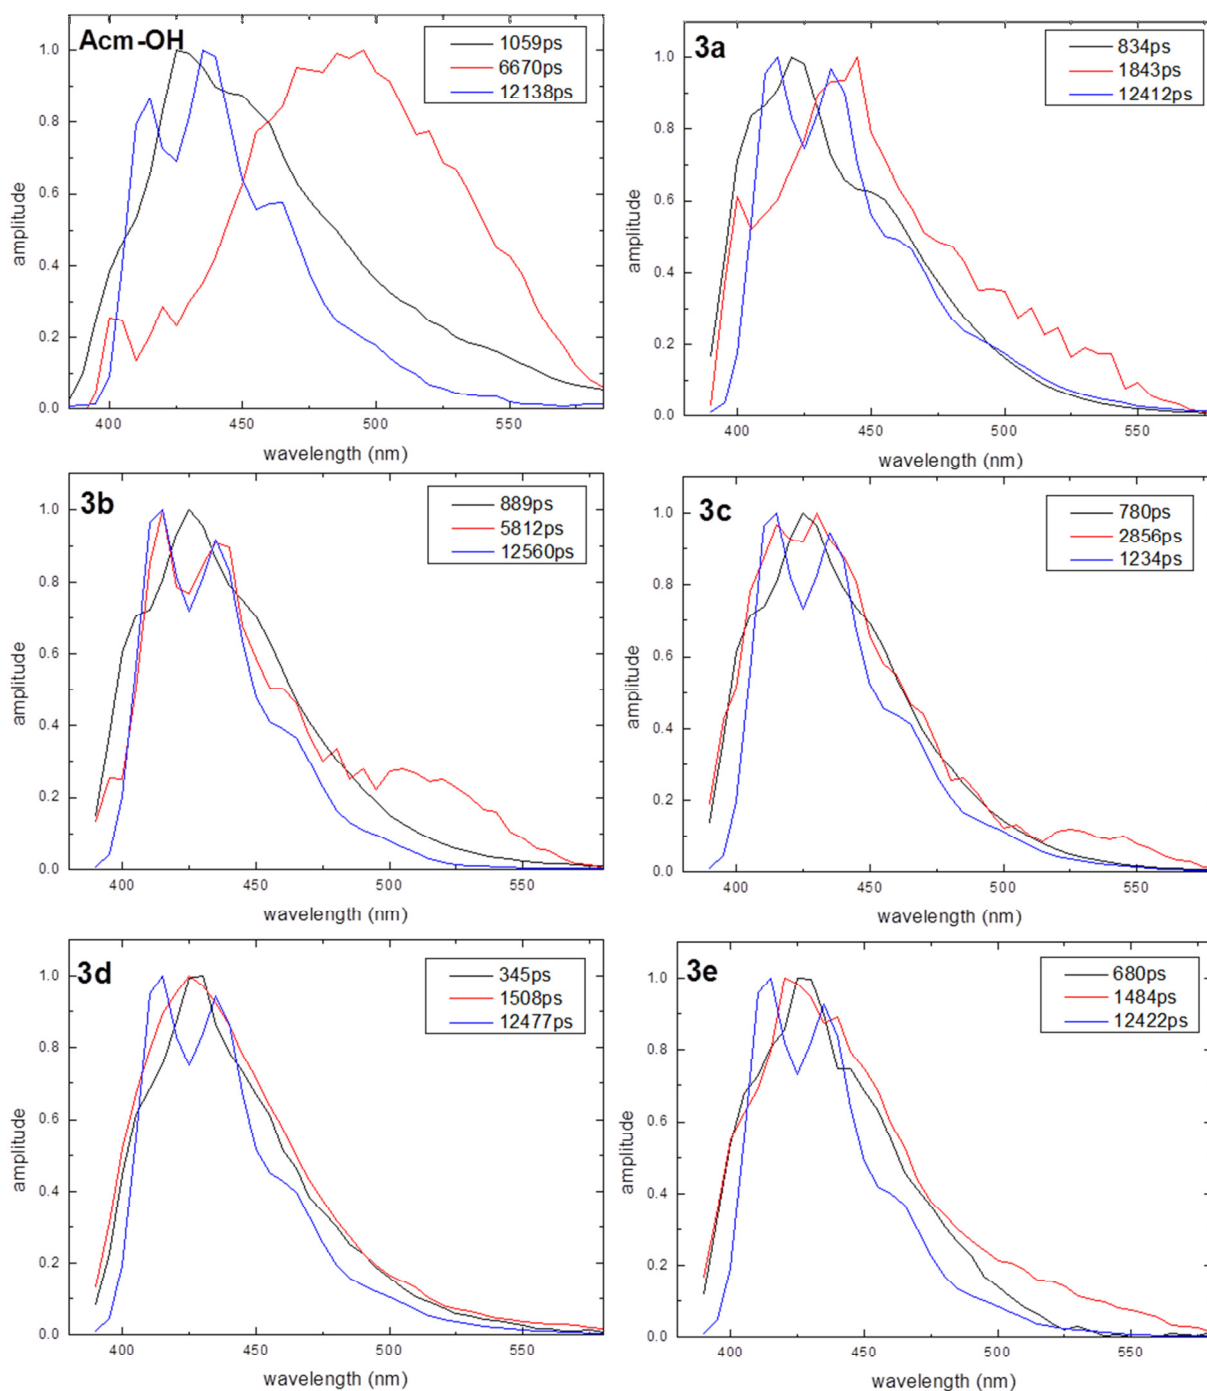

Supplement: c2pp25261a.pdf [file c2pp25261a.pdf]
